# Supplementary material
Source: PubMed Central journal article supplement (PMC7154951)
Supplement: jamapediatr-174-657-s001.pdf [file jamapediatr-174-657-s001.pdf]

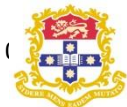

The University of Sydney

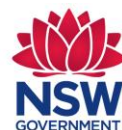

Health  
Sydney  
Local Health District

# **A 3-Arm randomised controlled trial of Communicating Healthy Beginnings Advice by Telephone (CHAT) to mothers with infants to prevent childhood obesity**

## **Statistical Analysis Plan**

**Prepared by: Dr. Huilan Xu (Statistician) & Prof. Li Ming Wen (PI)**

**Draft version date: 18/07/2017**

**Revised version date: 1/11/2019**

**Approved by: Prof Li Ming Wen on behalf of Co-Investigators**

**Signature:**

**Date: 28/08/2017**

**Revised version date: 1/11/2019**

## Contents

|                                                                |    |
|----------------------------------------------------------------|----|
| <b>1. Introduction</b> .....                                   | 1  |
| <b>2. Objectives</b> .....                                     | 1  |
| <b>3. Methods</b> .....                                        | 2  |
| 3.1 Study population/Subgroup .....                            | 2  |
| 3.2 Data sources .....                                         | 2  |
| 3.3 Endpoints & Study measures .....                           | 3  |
| 3.3.1 Main exposure variables .....                            | 3  |
| 3.3.2 Outcome variables .....                                  | 3  |
| 3.4 Data cleaning & Missing data .....                         | 4  |
| 3.5 Statistical methodology/Sequence of planned analyses ..... | 4  |
| 3.5.1 Descriptive analysis .....                               | 5  |
| 3.5.2 Hypotheses testing .....                                 | 5  |
| 3.5.3 Sub-group analysis .....                                 | 6  |
| <b>4. Planned tables and figures</b> .....                     | 7  |
| 4.1 Analysis at 12 months .....                                | 7  |
| Table 1 .....                                                  | 7  |
| Table 2 .....                                                  | 8  |
| Table 3 .....                                                  | 9  |
| Table 4 .....                                                  | 10 |
| 4.2 Analysis at 24 months .....                                | 11 |
| Table 1 .....                                                  | 11 |
| Table 2 .....                                                  | 12 |
| Table 3 .....                                                  | 13 |
| Table 4 .....                                                  | 14 |
| <b>5. Appendices</b> .....                                     | 15 |
| Appendix I .....                                               | 15 |
| Appendix II .....                                              | 18 |
| Appendix III .....                                             | 20 |
| Appendix IV .....                                              | 22 |

## 1. Introduction

This is a 3-arm randomised controlled trial (RCT) with a consecutive sample of 1056 mothers with their newborn children in New South Wales (NSW) Australia. Pregnant women who are between weeks 28 and 34 of their pregnancy and attend one of seven hospitals within four NSW Local Health Districts will be invited to participate in the CHAT trial. Informed consent will be obtained, and after baseline data collection, participants will be randomly allocated to the telephone intervention, text messaging intervention, or the control group. The randomisation is stratified by Local Health Districts. The intervention comprises telephone consultations or text messages, together with 6 intervention packages being mailed at specific times from the third trimester of pregnancy until 12 months post birth.

This study aims to determine the effectiveness of Communicating Healthy Beginnings Advice by Telephone (CHAT) to mothers with infants in improving infant feeding practices and preventing the early onset of childhood overweight and obesity. The following data analysis plan is for data analyses at 6, 12 and 24 months of child age.

## 2. Objectives

To examine the effectiveness of telephone and SMS intervention in:

- improving mothers' infant feeding and physical activity practices at 6, 12 and 24 months of child age
- reducing overweight and obesity at 12 and 24 months of child age

Hypotheses to be tested

Compared with usual care, the intervention using either telephone support or SMS will lead to:

*(primary outcomes)*

- an increased breastfeeding rate and duration at 6 and 12 months
- appropriate timing of the introduction of solids at 6 months;
- a reduction in child BMI & BMI z-score at 12 and 24 months; and

*(secondary outcomes)*

- an increased rate of practising “tummy time” at 6 months;
- an increased rate of cup use and drinking water at 6 and 12 months;
- a decreased rate of bottle use at bedtime at 12 and 24 months;
- an increased rate of healthy dietary behaviour (i.e. having a meal together, family meal and no food for reward) of the child at 12 months;
- an increase in child physical activity levels and a reduction in child TV viewing time at 12 and 24 months;
- an increase in dietary quality (i.e. an increased intake of fruits/vegetables) and improved dietary behaviour (i.e. decreased food for reward) of the child at 24 months;
- demonstrated cost-effectiveness; and
- demonstrated feasibility and acceptability of the interventions.

### **3. Methods**

#### 3.1 Study population/Subgroup

The analysis populations: pregnant women and their children.

The inclusion criteria for pregnant women are:

- aged 16 years and over,
- at 28–34 weeks of pregnancy,
- able to communicate in English,
- having a mobile phone and
- living in the recruitment areas.

#### 3.2 Data sources

- Participants’ Registration form
- Baseline telephone survey
- 6 months telephone survey
- 12 months telephone survey
- 24 months telephone survey
- 24 months anthropometric measurement via home visit

### 3.3 Endpoints & Study measures

Endpoints are 6, 12, and 24 months of age. Data will be collected by CATI at baseline (third trimester), 6, 12, and 24 months of child age.

#### 3.3.1 Main exposure variables (definitions and derivations see Appendix I):

- intervention allocations
- recruitment sites
- women's age at registration
- children's age at data collection time points
- country of birth
- language spoken at home
- annual approximate household income
- women's current employment status
- marital status
- education level
- child's father's employment status
- child's father's education level
- first-time mother

#### 3.3.2 Outcome variables

*at 6 months (definitions and derivations see Appendix II)*

- exclusive breastfeeding status
- current breastfeeding status
- introduction of solid food
- cup usage
- age of starting tummy time
- tummy time frequency

*at 12 months(definitions and derivations see Appendix III)*

- current breastfeeding status
- breastfeeding duration
- child BMI & BMI z-score
- cup usage
- bottle use at bedtime

- meal together
- family meal (same meal)
- food for reward
- child active time
- child screen time

*at 24 months (definitions and derivations see Appendix IV)*

- child BMI & BMI z-score
- breastfeeding duration
- bottle use at bedtime
- children's vegetable consumption
- children's fruit consumption
- meal together, have family meal, food for reward
- child outdoor play time
- child screen time

### 3.4 Data cleaning & Missing data

Outliers will be double checked and corrected. They will be treated as missing data if the values are not realistic and we cannot trace back to the original data source. Responses like 'don't know' and 'refuse to answer' will be treated as missing values if the number of such response is limited, otherwise, the response will be categorised as one category.

To address potential bias due to missing data and loss to follow-up, missing data will be imputed using multiple imputations with chained equations.

### 3.5 Statistical methodology/Sequence of planned analyses

Statistical analysis will be conducted using statistical software Stata version 13 (StataCorp, 2013). Data analysis will be conducted after the data collection at 6, 12 and 24 months of child age respectively as the outcome measures are age specific.

The intention-to-treat principle will be applied for data analysis, i.e., we compared the outcomes based on participants' initial group allocations at baseline regardless of whether they received the interventions (i.e. telephone support or SMS) or not. Both intention-to-treat analysis with multiple imputations and complete-case analysis will be conducted to see whether results from multiple imputations are supported by those from complete-case analysis.

### 3.5.1 Descriptive analysis

Descriptive analysis will be conducted. Mean and standard deviation will be reported for continuous variables. Number and percentage will be reported for categorical variables. For intention-to-treat analysis with multiple imputations, Stata's '**mi estimate**' command will be used to estimate the means or proportions for continuous variables or categorical variables respectively.

### 3.5.2 Hypotheses testing

The hypotheses will be tested firstly by fitting multiple regression models (linear regression models for continuous outcomes, logistic regression models for binary outcomes). Recruitment sites will be included in the models. Other potential confounding factors will be assessed and addressed. A 10% change in coefficient or odds ratio will be used as the cutoff to determine confounding factors.

For multiple linear regressions models, adjusted coefficient ( $\beta$ ) with 95% confidence interval (CI) will be reported. For multiple logistic regression models, adjusted odds ratios (AORs) with 95% CI will be reported. All P values are two sided and significance level is set at 5%.

Since there are multiple outcomes at 6, 12 and 24 months, multiple comparisons which may cause false positives will be inevitable. Therefore, Bonferroni correction will be used to account for multiple testing.

#### *Analysis at 6 and 12 months of age*

Cross-sectional comparison analysis will be conducted for outcomes at 6 and 12 months since most outcomes are age specific and not measured repeatedly.

#### *Analysis at 24 months of age*

Random-intercept mixed models or generalised estimating equations(GEE) will be built to take into account correlations between repeated measures such as child BMI or BMI z-score and dietary behaviour (measured at both 12 and 24 months of age) when analysing data at 24 months.

Survival analysis will be conducted for the outcome of breastfeeding duration at 24 months. Multiple Cox proportional hazards regression models adjusted for recruitment sites will be built to examine the intervention effect on breastfeeding duration. The

estimated adjusted hazard ratios (AHRs) for breastfeeding cessation with 95% CI will be calculated.

### 3.5.3 Sub-group analysis

Sub-group analysis for control group will be conducted to investigate the associations of demographics and mothers' health related behaviours and practices with primary and secondary outcomes.

Sub-group analysis will also be conducted by Local Health Districts, i.e.

- Sydney Local Health District
- South Eastern Sydney Local Health District
- South Western Sydney Local Health District
- Southern NSW Local Health District



#### 4. Planned tables and figures

##### 4.1 Analysis at 12 months

Table 1: Mothers' characteristics at baseline by group allocation

| Variables                                          | Total<br>N=<br>n (%) | Tel-support<br>n=<br>n (%) | SMS<br>n=<br>n (%) | Control<br>n=<br>n (%) |
|----------------------------------------------------|----------------------|----------------------------|--------------------|------------------------|
| <b>Mother's age</b>                                |                      |                            |                    |                        |
| 16-24                                              | xxx (xx)             | xxx (xx)                   | xxx (xx)           | xxx (xx)               |
| 25-29                                              | xxx (xx)             | xxx (xx)                   | xxx (xx)           | xxx (xx)               |
| 30-34                                              | xxx (xx)             | xxx (xx)                   | xxx (xx)           | xxx (xx)               |
| 35-39                                              | xxx (xx)             | xxx (xx)                   | xxx (xx)           | xxx (xx)               |
| 40-49                                              | xxx (xx)             | xxx (xx)                   | xxx (xx)           | xxx (xx)               |
| <b>Country of birth</b>                            |                      |                            |                    |                        |
| Australia                                          | xxx (xx)             | xxx (xx)                   | xxx (xx)           | xxx (xx)               |
| Other                                              | xxx (xx)             | xxx (xx)                   | xxx (xx)           | xxx (xx)               |
| <b>Language spoken at home</b>                     |                      |                            |                    |                        |
| English                                            | xxx (xx)             | xxx (xx)                   | xxx (xx)           | xxx (xx)               |
| Other                                              | xxx (xx)             | xxx (xx)                   | xxx (xx)           | xxx (xx)               |
| <b>Annual household income</b>                     |                      |                            |                    |                        |
| < \$ 40,000                                        | xxx (xx)             | xxx (xx)                   | xxx (xx)           | xxx (xx)               |
| \$ 40,000 to \$79,999                              | xxx (xx)             | xxx (xx)                   | xxx (xx)           | xxx (xx)               |
| ≥ \$ 80,000                                        | xxx (xx)             | xxx (xx)                   | xxx (xx)           | xxx (xx)               |
| Don't know/Refused                                 | xxx (xx)             | xxx (xx)                   | xxx (xx)           | xxx (xx)               |
| <b>Employment status</b>                           |                      |                            |                    |                        |
| Employed<br>(employed/paid/unpaid maternity leave) | xxx (xx)             | xxx (xx)                   | xxx (xx)           | xxx (xx)               |
| Other                                              | xxx (xx)             | xxx (xx)                   | xxx (xx)           | xxx (xx)               |
| Unknown                                            | xxx (xx)             | xxx (xx)                   | xxx (xx)           | xxx (xx)               |
| <b>Marital status</b>                              |                      |                            |                    |                        |
| Married/de-facto partner                           | xxx (xx)             | xxx (xx)                   | xxx (xx)           | xxx (xx)               |
| Other                                              | xxx (xx)             | xxx (xx)                   | xxx (xx)           | xxx (xx)               |
| Unknown                                            | xxx (xx)             | xxx (xx)                   | xxx (xx)           | xxx (xx)               |
| <b>Education level</b>                             |                      |                            |                    |                        |
| Up to HSC* to TAFE^/Diploma                        | xxx (xx)             | xxx (xx)                   | xxx (xx)           | xxx (xx)               |
| University                                         | xxx (xx)             | xxx (xx)                   | xxx (xx)           | xxx (xx)               |
| Unknown                                            | xxx (xx)             | xxx (xx)                   | xxx (xx)           | xxx (xx)               |
| <b>Father's employment status</b>                  |                      |                            |                    |                        |
| Employed                                           | xxx (xx)             | xxx (xx)                   | xxx (xx)           | xxx (xx)               |
| Other                                              | xxx (xx)             | xxx (xx)                   | xxx (xx)           | xxx (xx)               |
| Unknown                                            | xxx (xx)             | xxx (xx)                   | xxx (xx)           | xxx (xx)               |
| <b>Father's education level</b>                    |                      |                            |                    |                        |
| Up to HSC* to TAFE^/Diploma                        | xxx (xx)             | xxx (xx)                   | xxx (xx)           | xxx (xx)               |
| University                                         | xxx (xx)             | xxx (xx)                   | xxx (xx)           | xxx (xx)               |
| Unknown                                            | xxx (xx)             | xxx (xx)                   | xxx (xx)           | xxx (xx)               |
| <b>First time mother</b>                           |                      |                            |                    |                        |
| No                                                 | xxx (xx)             | xxx (xx)                   | xxx (xx)           | xxx (xx)               |
| Yes                                                | xxx (xx)             | xxx (xx)                   | xxx (xx)           | xxx (xx)               |

\*HSC: Higher School Certificate (Year 12), ^TAFE: Technical and Further Education

Table 2 Mothers' baseline characteristics by survey completion at 6 and 12 months

| Mother's baseline demographics    | 6 months survey completion |          | P     | 1 year survey completion |          | P     |
|-----------------------------------|----------------------------|----------|-------|--------------------------|----------|-------|
|                                   | Yes n (%)                  | No n (%) |       | Yes n (%)                | No n (%) |       |
| <b>Age (years)</b>                |                            |          | xxxxx |                          |          | xxxxx |
| 16-24                             | xxx (xx)                   | xxx (xx) |       | xxx (xx)                 | xxx (xx) |       |
| 25-29                             | xxx (xx)                   | xxx (xx) |       | xxx (xx)                 | xxx (xx) |       |
| 30-34                             | xxx (xx)                   | xxx (xx) |       | xxx (xx)                 | xxx (xx) |       |
| 35-39                             | xxx (xx)                   | xxx (xx) |       | xxx (xx)                 | xxx (xx) |       |
| 40-49                             | xxx (xx)                   | xxx (xx) |       | xxx (xx)                 | xxx (xx) |       |
| <b>Country of birth</b>           |                            |          | xxxxx |                          |          | xxxxx |
| Australia                         | xxx (xx)                   | xxx (xx) |       | xxx (xx)                 | xxx (xx) |       |
| Overseas                          | xxx (xx)                   | xxx (xx) |       | xxx (xx)                 | xxx (xx) |       |
| <b>Language spoken at home</b>    |                            |          | xxxxx |                          |          | xxxxx |
| English                           | xxx (xx)                   | xxx (xx) |       | xxx (xx)                 | xxx (xx) |       |
| Other                             | xxx (xx)                   | xxx (xx) |       | xxx (xx)                 | xxx (xx) |       |
| <b>Annual household income</b>    |                            |          | xxxxx |                          |          | xxxxx |
| <\$ 40,000                        | xxx (xx)                   | xxx (xx) |       | xxx (xx)                 | xxx (xx) |       |
| \$ 40,000 to \$79,999             | xxx (xx)                   | xxx (xx) |       | xxx (xx)                 | xxx (xx) |       |
| ≥\$ 80,000                        | xxx (xx)                   | xxx (xx) |       | xxx (xx)                 | xxx (xx) |       |
| Don't know                        | xxx (xx)                   | xxx (xx) |       | xxx (xx)                 | xxx (xx) |       |
| <b>Employment status</b>          |                            |          | xxxxx |                          |          | xxxxx |
| Employed                          | xxx (xx)                   | xxx (xx) |       | xxx (xx)                 | xxx (xx) |       |
| Other                             | xxx (xx)                   | xxx (xx) |       | xxx (xx)                 | xxx (xx) |       |
| Unknown                           | xxx (xx)                   | xxx (xx) |       | xxx (xx)                 | xxx (xx) |       |
| <b>Marital status</b>             |                            |          | xxxxx |                          |          | xxxxx |
| Married/de-facto partner          | xxx (xx)                   | xxx (xx) |       | xxx (xx)                 | xxx (xx) |       |
| Other                             | xxx (xx)                   | xxx (xx) |       | xxx (xx)                 | xxx (xx) |       |
| Unknown                           | xxx (xx)                   | xxx (xx) |       | xxx (xx)                 | xxx (xx) |       |
| <b>Education level</b>            |                            |          | xxxxx |                          |          | xxxxx |
| University &                      | xxx (xx)                   | xxx (xx) |       | xxx (xx)                 | xxx (xx) |       |
| Up to HSC/TAFE                    | xxx (xx)                   | xxx (xx) |       | xxx (xx)                 | xxx (xx) |       |
| Unknown                           | xxx (xx)                   | xxx (xx) |       | xxx (xx)                 | xxx (xx) |       |
| <b>Father's education level</b>   |                            |          | xxxxx |                          |          | xxxxx |
| University &                      | xxx (xx)                   | xxx (xx) |       | xxx (xx)                 | xxx (xx) |       |
| Up to HSC/TAFE                    | xxx (xx)                   | xxx (xx) |       | xxx (xx)                 | xxx (xx) |       |
| Unknown                           | xxx (xx)                   | xxx (xx) |       | xxx (xx)                 | xxx (xx) |       |
| <b>Father's employment status</b> |                            |          | xxxxx |                          |          | xxxxx |
| Employed                          | xxx (xx)                   | xxx (xx) |       | xxx (xx)                 | xxx (xx) |       |
| Other                             | xxx (xx)                   | xxx (xx) |       | xxx (xx)                 | xxx (xx) |       |
| Unknown                           | xxx (xx)                   | xxx (xx) |       | xxx (xx)                 | xxx (xx) |       |
| <b>First-time mother</b>          |                            |          | xxxxx |                          |          | xxxxx |
| Yes                               | xxx (xx)                   | xxx (xx) |       | xxx (xx)                 | xxx (xx) |       |
| No                                | xxx (xx)                   | xxx (xx) |       | xxx (xx)                 | xxx (xx) |       |

P: P values of Pearson's Chi-squared tests.

Table 3: Comparisons of outcomes between each of the intervention groups and control group at 6 and 12 months of age (intention-to-treat analysis with multiple imputations)

| Outcomes                          | Tel-support<br>Total=xxx<br>n (%) | Control<br>Total=xxx<br>n (%) | SMS<br>Total=xxx<br>n (%) | Tel-support vs. Control<br>AOR (95% CI) | SMS vs. Control<br>AOR (95% CI) |
|-----------------------------------|-----------------------------------|-------------------------------|---------------------------|-----------------------------------------|---------------------------------|
| <b>Outcomes at 6 months</b>       |                                   |                               |                           |                                         |                                 |
| <b>Exclusive breastfeeding</b>    |                                   |                               |                           |                                         |                                 |
| Yes                               | xx (xx)                           | xx (xx)                       | xx (xx)                   | xxx (xxx - xxx)                         | xxx (xxx - xxx)                 |
| <b>Current breastfeeding</b>      |                                   |                               |                           |                                         |                                 |
| Yes                               | xxx (xx)                          | xxx (xx)                      | xxx (xx)                  | xxx (xxx - xxx)                         | xxx (xxx - xxx)                 |
| <b>Introduction of solid food</b> |                                   |                               |                           |                                         |                                 |
| 6 months                          | xxx (xx)                          | xxx (xx)                      | xxx (xx)                  | xxx (xxx - xxx)                         | xxx (xxx - xxx)                 |
| <b>Age of starting tummy time</b> |                                   |                               |                           |                                         |                                 |
| <4 weeks                          | xxx (xx)                          | xxx (xx)                      | xxx (xx)                  | xxx (xxx - xxx)                         | xxx (xxx - xxx)                 |
| <b>Tummy time frequency</b>       |                                   |                               |                           |                                         |                                 |
| Every day                         | xxx (xx)                          | xxx (xx)                      | xxx (xx)                  | xxx (xxx - xxx)                         | xxx (xxx - xxx)                 |
| <b>Drinking from cup</b>          |                                   |                               |                           |                                         |                                 |
| Yes                               | xxx (xx)                          | xxx (xx)                      | xxx (xx)                  | xxx (xxx - xxx)                         | xxx (xxx - xxx)                 |
| <b>Outcomes at 12 months</b>      |                                   |                               |                           |                                         |                                 |
| <b>Current breastfeeding</b>      |                                   |                               |                           |                                         |                                 |
| Yes                               | xxx (xx)                          | xxx (xx)                      | xxx (xx)                  | xxx (xxx - xxx)                         | xxx (xxx - xxx)                 |
| <b>Drinking from cup</b>          |                                   |                               |                           |                                         |                                 |
| Yes                               | xxx (xx)                          | xxx (xx)                      | xxx (xx)                  | xxx (xxx - xxx)                         | xxx (xxx - xxx)                 |
| <b>Having bottle at bedtime</b>   |                                   |                               |                           |                                         |                                 |
| No                                | xxx (xx)                          | xxx (xx)                      | xxx (xx)                  | xxx (xxx - xxx)                         | xxx (xxx - xxx)                 |
| <b>Having meal together</b>       |                                   |                               |                           |                                         |                                 |
| Yes                               | xxx (xx)                          | xxx (xx)                      | xxx (xx)                  | xxx (xxx - xxx)                         | xxx (xxx - xxx)                 |
| <b>Having family meal</b>         |                                   |                               |                           |                                         |                                 |
| Yes                               | xxx (xx)                          | xxx (xx)                      | xxx (xx)                  | xxx (xxx - xxx)                         | xxx (xxx - xxx)                 |
| <b>Food for reward</b>            |                                   |                               |                           |                                         |                                 |
| No                                | xxx (xx)                          | xxx (xx)                      | xxx (xx)                  | xxx (xxx - xxx)                         | xxx (xxx - xxx)                 |
| <b>Child active time</b>          |                                   |                               |                           |                                         |                                 |
| >2 hours/day                      | xxx (xx)                          | xxx (xx)                      | xxx (xx)                  | xxx (xxx - xxx)                         | xxx (xxx - xxx)                 |
| <b>Ever having screen time</b>    |                                   |                               |                           |                                         |                                 |
| No                                | xxx (xx)                          | xxx (xx)                      | xxx (xx)                  | xxx (xxx - xxx)                         | xxx (xxx - xxx)                 |

AOR: adjusted odds ratio, adjusted for recruitment sites. \* : P values with Bonferroni correction <0.05.

Table 4 Comparisons of outcomes between each of the intervention groups and control group at 6 and 12 months of age (complete case analysis)

| Outcomes                          | Tel-support<br>n (%) | Control<br>n (%) | SMS<br>n (%) | Tel-support vs. Control<br>AOR (95% CI) | SMS vs. Control<br>AOR (95% CI) |
|-----------------------------------|----------------------|------------------|--------------|-----------------------------------------|---------------------------------|
| <b>Outcomes at 6 months</b>       |                      |                  |              |                                         |                                 |
| <b>Exclusive breastfeeding</b>    |                      |                  |              |                                         |                                 |
| Yes                               | xxx (xx)             | xxx (xx)         | xxx (xx)     | xxx (xxx - xxx)                         | xxx (xxx - xxx)                 |
| No                                | xxx (xx)             | xxx (xx)         | xxx (xx)     |                                         |                                 |
| <b>Current breastfeeding</b>      |                      |                  |              |                                         |                                 |
| Yes                               | xxx (xx)             | xxx (xx)         | xxx (xx)     | xxx (xxx - xxx)                         | xxx (xxx - xxx)                 |
| No                                | xxx (xx)             | xxx (xx)         | xxx (xx)     |                                         |                                 |
| <b>Introduction of solid food</b> |                      |                  |              |                                         |                                 |
| 6 months                          | xxx (xx)             | xxx (xx)         | xxx (xx)     | xxx (xxx - xxx)                         | xxx (xxx - xxx)                 |
| Before or after 6 months          | xxx (xx)             | xxx (xx)         | xxx (xx)     |                                         |                                 |
| <b>Age of starting tummy time</b> |                      |                  |              |                                         |                                 |
| <4 weeks                          | xxx (xx)             | xxx (xx)         | xxx (xx)     | xxx (xxx - xxx)                         | xxx (xxx - xxx)                 |
| ≥4 weeks                          | xxx (xx)             | xxx (xx)         | xxx (xx)     |                                         |                                 |
| <b>Tummy time frequency</b>       |                      |                  |              |                                         |                                 |
| Every day                         | xxx (xx)             | xxx (xx)         | xxx (xx)     | xxx (xxx - xxx)                         | xxx (xxx - xxx)                 |
| Not every day                     | xxx (xx)             | xxx (xx)         | xxx (xx)     |                                         |                                 |
| <b>Drinking from cup</b>          |                      |                  |              |                                         |                                 |
| Yes                               | xxx (xx)             | xxx (xx)         | xxx (xx)     | xxx (xxx - xxx)                         | xxx (xxx - xxx)                 |
| No                                | xxx (xx)             | xxx (xx)         | xxx (xx)     |                                         |                                 |
| <b>Outcomes at 12 months</b>      |                      |                  |              |                                         |                                 |
| <b>Current breastfeeding</b>      |                      |                  |              |                                         |                                 |
| Yes                               | xxx (xx)             | xxx (xx)         | xxx (xx)     | xxx (xxx - xxx)                         | xxx (xxx - xxx)                 |
| No                                | xxx (xx)             | xxx (xx)         | xxx (xx)     |                                         |                                 |
| <b>Drinking from cup</b>          |                      |                  |              |                                         |                                 |
| Yes                               | xxx (xx)             | xxx (xx)         | xxx (xx)     | xxx (xxx - xxx)                         | xxx (xxx - xxx)                 |
| No                                | xxx (xx)             | xxx (xx)         | xxx (xx)     |                                         |                                 |
| <b>Having bottle at bedtime</b>   |                      |                  |              |                                         |                                 |
| Yes                               | xxx (xx)             | xxx (xx)         | xxx (xx)     | xxx (xxx - xxx)                         | xxx (xxx - xxx)                 |
| No                                | xxx (xx)             | xxx (xx)         | xxx (xx)     |                                         |                                 |
| <b>Having meal together</b>       |                      |                  |              |                                         |                                 |
| Yes                               | xxx (xx)             | xxx (xx)         | xxx (xx)     | xxx (xxx - xxx)                         | xxx (xxx - xxx)                 |
| No                                | xxx (xx)             | xxx (xx)         | xxx (xx)     |                                         |                                 |
| <b>Having family meal</b>         |                      |                  |              |                                         |                                 |
| Yes                               | xxx (xx)             | xxx (xx)         | xxx (xx)     | xxx (xxx - xxx)                         | xxx (xxx - xxx)                 |
| No                                | xxx (xx)             | xxx (xx)         | xxx (xx)     |                                         |                                 |
| <b>Food for reward</b>            |                      |                  |              |                                         |                                 |
| Yes                               | xxx (xx)             | xxx (xx)         | xxx (xx)     | xxx (xxx - xxx)                         | xxx (xxx - xxx)                 |
| No                                | xxx (xx)             | xxx (xx)         | xxx (xx)     |                                         |                                 |
| <b>Child outdoor play time</b>    |                      |                  |              |                                         |                                 |
| >2 hours/day                      | xxx (xx)             | xxx (xx)         | xxx (xx)     | xxx (xxx - xxx)                         | xxx (xxx - xxx)                 |
| ≤2 hours/day                      | xxx (xx)             | xxx (xx)         | xxx (xx)     |                                         |                                 |
| <b>Ever having screen time</b>    |                      |                  |              |                                         |                                 |
| Yes                               | xxx (xx)             | xxx (xx)         | xxx (xx)     | xxx (xxx - xxx)                         | xxx (xxx - xxx)                 |
| No                                | xxx (xx)             | xxx (xx)         | xxx (xx)     |                                         |                                 |

AOR: adjusted odds ratio, adjusted for recruitment sites.

\* : P values with Bonferroni correction <0.05.

4.2 Analysis at 24 months

Table 1 Mothers' baseline characteristics by survey completion at 1 and 2 years of age

| Mother's baseline demographics    | 1 year survey completion |          | P     | 2 year survey completion |          | P     |
|-----------------------------------|--------------------------|----------|-------|--------------------------|----------|-------|
|                                   | Yes n (%)                | No n (%) |       | Yes n (%)                | No n (%) |       |
| <b>Age (years)</b>                |                          |          | xxxxx |                          |          | xxxxx |
| 16-24                             | xxx (xx)                 | xxx (xx) |       | xxx (xx)                 | xxx (xx) |       |
| 25-29                             | xxx (xx)                 | xxx (xx) |       | xxx (xx)                 | xxx (xx) |       |
| 30-34                             | xxx (xx)                 | xxx (xx) |       | xxx (xx)                 | xxx (xx) |       |
| 35-39                             | xxx (xx)                 | xxx (xx) |       | xxx (xx)                 | xxx (xx) |       |
| 40-49                             | xxx (xx)                 | xxx (xx) |       | xxx (xx)                 | xxx (xx) |       |
| <b>Country of birth</b>           |                          |          | xxxxx |                          |          | xxxxx |
| Australia                         | xxx (xx)                 | xxx (xx) |       | xxx (xx)                 | xxx (xx) |       |
| Overseas                          | xxx (xx)                 | xxx (xx) |       | xxx (xx)                 | xxx (xx) |       |
| <b>Language spoken at home</b>    |                          |          | xxxxx |                          |          | xxxxx |
| English                           | xxx (xx)                 | xxx (xx) |       | xxx (xx)                 | xxx (xx) |       |
| Other                             | xxx (xx)                 | xxx (xx) |       | xxx (xx)                 | xxx (xx) |       |
| <b>Annual household income</b>    |                          |          | xxxxx |                          |          | xxxxx |
| <\$ 40,000                        | xxx (xx)                 | xxx (xx) |       | xxx (xx)                 | xxx (xx) |       |
| \$ 40,000 to \$79,999             | xxx (xx)                 | xxx (xx) |       | xxx (xx)                 | xxx (xx) |       |
| ≥\$ 80,000                        | xxx (xx)                 | xxx (xx) |       | xxx (xx)                 | xxx (xx) |       |
| Don't know                        | xxx (xx)                 | xxx (xx) |       | xxx (xx)                 | xxx (xx) |       |
| <b>Employment status</b>          |                          |          | xxxxx |                          |          | xxxxx |
| Employed                          | xxx (xx)                 | xxx (xx) |       | xxx (xx)                 | xxx (xx) |       |
| Other                             | xxx (xx)                 | xxx (xx) |       | xxx (xx)                 | xxx (xx) |       |
| Unknown                           | xxx (xx)                 | xxx (xx) |       | xxx (xx)                 | xxx (xx) |       |
| <b>Marital status</b>             |                          |          | xxxxx |                          |          | xxxxx |
| Married/de-facto partner          | xxx (xx)                 | xxx (xx) |       | xxx (xx)                 | xxx (xx) |       |
| Other                             | xxx (xx)                 | xxx (xx) |       | xxx (xx)                 | xxx (xx) |       |
| Unknown                           | xxx (xx)                 | xxx (xx) |       | xxx (xx)                 | xxx (xx) |       |
| <b>Education level</b>            |                          |          | xxxxx |                          |          | xxxxx |
| University &                      | xxx (xx)                 | xxx (xx) |       | xxx (xx)                 | xxx (xx) |       |
| Up to HSC/TAFE                    | xxx (xx)                 | xxx (xx) |       | xxx (xx)                 | xxx (xx) |       |
| Unknown                           | xxx (xx)                 | xxx (xx) |       | xxx (xx)                 | xxx (xx) |       |
| <b>Father's education level</b>   |                          |          | xxxxx |                          |          | xxxxx |
| University &                      | xxx (xx)                 | xxx (xx) |       | xxx (xx)                 | xxx (xx) |       |
| Up to HSC/TAFE                    | xxx (xx)                 | xxx (xx) |       | xxx (xx)                 | xxx (xx) |       |
| Unknown                           | xxx (xx)                 | xxx (xx) |       | xxx (xx)                 | xxx (xx) |       |
| <b>Father's employment status</b> |                          |          | xxxxx |                          |          | xxxxx |
| Employed                          | xxx (xx)                 | xxx (xx) |       | xxx (xx)                 | xxx (xx) |       |
| Other                             | xxx (xx)                 | xxx (xx) |       | xxx (xx)                 | xxx (xx) |       |
| Unknown                           | xxx (xx)                 | xxx (xx) |       | xxx (xx)                 | xxx (xx) |       |
| <b>First time mother</b>          |                          |          | xxxxx |                          |          | xxxxx |
| Yes                               | xxx (xx)                 | xxx (xx) |       | xxx (xx)                 | xxx (xx) |       |
| No                                | xxx (xx)                 | xxx (xx) |       | xxx (xx)                 | xxx (xx) |       |

P: P values of Pearson's Chi-squared tests.

Table 2 Risk of discontinuing breastfeeding by intervention groups

| Variables                   | Risk of discontinuing breastfeeding |      |
|-----------------------------|-------------------------------------|------|
|                             | AHR (95% CI)                        | P    |
| <b>Intervention groups*</b> |                                     | XXXX |
| Control                     | 1                                   |      |
| Telephone support           | xxx (xxx - xxx)                     |      |
| SMS                         | xxx (xxx - xxx)                     |      |
| <b>Intervention groups#</b> |                                     | XXXX |
| Control                     | 1                                   |      |
| Telephone support           | xxx (xxx - xxx)                     |      |
| SMS                         | xxx (xxx - xxx)                     |      |

\*: Intention to treat analysis with multiple imputations

#: Complete case analysis

Table 3: Comparisons of outcomes between each of the intervention groups and control group at 12 and 24 months of age (intention-to-treat analysis with multiple imputations)

| <b>Outcomes</b>                 | <b>Tel-support<br/>Total=<br/>mean (SD)</b> | <b>Control<br/>Total=<br/>mean (SD)</b> | <b>SMS<br/>Total=<br/>mean (SD)</b> | <b>Tel-support vs. control<br/><math>\beta</math> (95% CI)</b> | <b>SMS vs. control<br/><math>\beta</math> (95% CI)</b> |
|---------------------------------|---------------------------------------------|-----------------------------------------|-------------------------------------|----------------------------------------------------------------|--------------------------------------------------------|
| <b>BMI</b>                      | xx (xx)                                     | xx (xx)                                 | xx (xx)                             | xx (xx to xx)                                                  | xx (xx to xx)                                          |
| <b>BMI z-score</b>              | xx (xx)                                     | xx (xx)                                 | xx (xx)                             | xx (xx to xx)                                                  | xx (xx to xx)                                          |
|                                 | <b>n (%)</b>                                | <b>n (%)</b>                            | <b>n (%)</b>                        | <b>AOR (95% CI)</b>                                            | <b>AOR (95% CI)</b>                                    |
| <b>Having bottle at bedtime</b> |                                             |                                         |                                     |                                                                |                                                        |
| No                              | xxx (xx)                                    | xxx (xx)                                | xxx (xx)                            | xxx (xxx - xxx)                                                | xxx (xxx - xxx)                                        |
| <b>Food for reward</b>          |                                             |                                         |                                     |                                                                |                                                        |
| No                              | xxx (xx)                                    | xxx (xx)                                | xxx (xx)                            | xxx (xxx - xxx)                                                | xxx (xxx - xxx)                                        |
| <b>Child outdoor play time</b>  |                                             |                                         |                                     |                                                                |                                                        |
| >2 hours/day                    | xxx (xx)                                    | xxx (xx)                                | xxx (xx)                            | xxx (xxx - xxx)                                                | xxx (xxx - xxx)                                        |
| <b>Ever having screen time</b>  |                                             |                                         |                                     |                                                                |                                                        |
| No                              | xxx (xx)                                    | xxx (xx)                                | xxx (xx)                            | xxx (xxx - xxx)                                                | xxx (xxx - xxx)                                        |

$\beta$ : mean difference adjusted for recruitment sites, from linear random-intercept models.

AOR: adjusted odds ratio, adjusted for recruitment sites, from logistic random-intercept models.

\*: P values with Bonferroni correction <0.05.

Table 4: Comparisons of outcomes between each of the intervention groups and control group at 12 and 24 months of age (complete case analysis)

| Outcomes                        | Tel-support<br>Total=<br>mean (SD) | Control<br>Total=<br>mean (SD) | SMS<br>Total=<br>mean (SD) | Tel-support vs. control<br>$\beta$ (95% CI) | SMS vs. control<br>$\beta$ (95% CI) |
|---------------------------------|------------------------------------|--------------------------------|----------------------------|---------------------------------------------|-------------------------------------|
| <b>BMI</b>                      | xx (xx)                            | xx (xx)                        | xx (xx)                    | xx (xx to xx)                               | xx (xx to xx)                       |
| <b>BMI z-score</b>              | xx (xx)                            | xx (xx)                        | xx (xx)                    | xx (xx to xx)                               | xx (xx to xx)                       |
|                                 | <b>n (%)</b>                       | <b>n (%)</b>                   | <b>n (%)</b>               | <b>AOR (95% CI)</b>                         | <b>AOR (95% CI)</b>                 |
| <b>Having bottle at bedtime</b> |                                    |                                |                            |                                             |                                     |
| No                              | xxx (xx)                           | xxx (xx)                       | xxx (xx)                   | xxx (xxx - xxx)                             | xxx (xxx - xxx)                     |
| Yes                             | xxx (xx)                           | xxx (xx)                       | xxx (xx)                   |                                             |                                     |
| <b>Food for reward</b>          |                                    |                                |                            |                                             |                                     |
| No                              | xxx (xx)                           | xxx (xx)                       | xxx (xx)                   | xxx (xxx - xxx)                             | xxx (xxx - xxx)                     |
| Yes                             | xxx (xx)                           | xxx (xx)                       | xxx (xx)                   |                                             |                                     |
| <b>Child outdoor play time</b>  |                                    |                                |                            |                                             |                                     |
| >2 hours/day                    | xxx (xx)                           | xxx (xx)                       | xxx (xx)                   | xxx (xxx - xxx)                             | xxx (xxx - xxx)                     |
| ≤2 hours/day                    | xxx (xx)                           | xxx (xx)                       | xxx (xx)                   |                                             |                                     |
| <b>Ever having screen time</b>  |                                    |                                |                            |                                             |                                     |
| No                              | xxx (xx)                           | xxx (xx)                       | xxx (xx)                   | xxx (xxx - xxx)                             | xxx (xxx - xxx)                     |
| Yes                             | xxx (xx)                           | xxx (xx)                       | xxx (xx)                   |                                             |                                     |

$\beta$ : mean difference, from multiple linear regression models, adjusted for recruitment sites,.

AOR: adjusted odds ratio, from multiple logistic regression models, adjusted for recruitment sites.

\*: P values with Bonferroni correction <0.05



## 5. Appendices

### Appendix I

#### Main exposure variables

| Labels                      | Variables    | Responses                                                                                              | Type of data / coding                                        |
|-----------------------------|--------------|--------------------------------------------------------------------------------------------------------|--------------------------------------------------------------|
| Intervention allocations    | C_I_Group    | Participants are randomly allocated to:<br>Control<br>Telephone support<br>SMS                         | 0 – Control<br>1 – Telephone support<br>2 - SMS              |
| Recruitment sites           | Site4g       | SLHD<br>SESLHD<br>SWSLHD<br>SNSWLHD                                                                    | 0 - SLHD<br>1 – SESLHD<br>2 – SWSLHD<br>3 - SNSWLHD          |
| Women’s age at registration | R_age        | Years                                                                                                  | Continuous data in years                                     |
|                             | R-age5g      |                                                                                                        | 0- 16-24<br>1 - 25-29<br>2 - 30-34<br>3 - 35-39<br>4 - 40-49 |
| Child age at 6 month survey | S6_Cage      | Child date of birth<br>6 months survey date<br>Calculation: Child date of birth – 6 months survey date | Continuous data in days                                      |
| Child age at 1 year survey  | Y1_Cage      | Child date of birth<br>1 year survey date<br>Calculation: Child date of birth – 1 year survey date     | Continuous data in days                                      |
| Child age at 2 year survey  | Y2_Cage      | Child date of birth<br>2 years survey date<br>Calculation: Child date of birth – 2 years survey date   | Continuous data in days                                      |
| First-time mother           | B_FirstTM    | Have had babies before this pregnancy<br>Haven’t had baby before this pregnancy                        | 0 - No<br>1 - Yes                                            |
| Country of birth            | B_41MCoungry | Australia<br>Other                                                                                     | 1 - Australia<br>0 - Other                                   |
| Language spoken at home     | B_42MH2g     | English<br>Other                                                                                       | 1 - English<br>0 - Other                                     |

Appendix I Continuous

| Labels                    | Variables      | Responses/derivations                      | Type of data / coding                                             |
|---------------------------|----------------|--------------------------------------------|-------------------------------------------------------------------|
| Annual household income   | B_44Income4g   | Less than \$10 000                         | 0 - <\$40,000                                                     |
|                           |                | \$10 000 – \$19 999                        |                                                                   |
|                           |                | \$20 000 – \$39 999                        |                                                                   |
|                           |                | \$40 000 – \$59 999                        | 1 - \$40,000 to \$79,999                                          |
|                           |                | \$60 000 – \$79 999                        |                                                                   |
|                           |                | \$80 000 – \$149 999                       | 2 - ≥\$80,000                                                     |
|                           |                | \$150 000 or more                          |                                                                   |
|                           |                | Don't know /Refused                        | 3 – don't know (treat as missing data in complete case analysis ) |
| Women's employment status | B_45MEmp3g     | Employed full-time (include self-employed) | 1 - Employed                                                      |
|                           |                | Employed part-time (include self-employed) |                                                                   |
|                           |                | Paid maternity leave – employed            |                                                                   |
|                           |                | Unpaid maternity leave – employed          |                                                                   |
|                           |                | Unemployed                                 | 0 – Other                                                         |
|                           |                | Casually employed                          |                                                                   |
|                           |                | Home duties                                |                                                                   |
|                           |                | Student and working                        |                                                                   |
|                           |                | Student and not working                    |                                                                   |
|                           |                | Retired                                    |                                                                   |
|                           |                | Full-time carer                            |                                                                   |
|                           |                | Unable to work due to health problems      |                                                                   |
|                           |                | Refused                                    | 2 – don't know (treat as missing data in complete case analysis ) |
| Women's marital status    | B_46MMarital3g | Married (refers to registered marriages)   | 1 - Married/living with partner                                   |
|                           |                | De-facto partner                           |                                                                   |
|                           |                | Divorced                                   | 0 - Never married/other                                           |
|                           |                | Separated but not divorced                 |                                                                   |
|                           |                | Widowed                                    |                                                                   |
|                           |                | Never married                              | 2 – don't know (treat as missing data in complete case analysis ) |
|                           |                | Refused                                    |                                                                   |

Appendix I Continuous

| Labels                     | Variables  | Responses/derivations                                                           | Type of data / coding                                             |
|----------------------------|------------|---------------------------------------------------------------------------------|-------------------------------------------------------------------|
| Women's education          | B_47MEdu3g | Completed primary school                                                        | 0 - Up to HSC to TAFE certificate or Diploma                      |
|                            |            | Completed years 7 to 9                                                          |                                                                   |
|                            |            | Completed School Certificate or Intermediate Certificate or Year 10 or 4th Form |                                                                   |
|                            |            | Completed High School Certificate or Leaving Certificate or Year 12 or 6th Form |                                                                   |
|                            |            | TAFE certificate or diploma                                                     |                                                                   |
|                            |            | University or some other tertiary institute degree or higher                    | 1 - University                                                    |
|                            |            | Other _____                                                                     | Categorise into relevant group                                    |
|                            |            | Don't know/ Refused                                                             | 2 – don't know (treat as missing data in complete case analysis ) |
| Father's employment status | B_53FEmp3g | Employed full-time (include self-employed)                                      | 1 - Employed                                                      |
|                            |            | Employed part-time (include self-employed)                                      |                                                                   |
|                            |            | Paid paternity leave – employed                                                 |                                                                   |
|                            |            | Unpaid paternity leave – employed                                               |                                                                   |
|                            |            | Unemployed                                                                      | 0 – other                                                         |
|                            |            | Casually employed                                                               |                                                                   |
|                            |            | Home duties                                                                     |                                                                   |
|                            |            | Student and working                                                             |                                                                   |
|                            |            | Student and not working                                                         |                                                                   |
|                            |            | Retired                                                                         |                                                                   |
|                            |            | Full-time carer                                                                 |                                                                   |
|                            |            | Unable to work due to health problems                                           | 2 – don't know (treat as missing data in complete case analysis ) |
| Don't know /Refused        |            |                                                                                 |                                                                   |
| Father's education         | B_54FEdu3g | Completed primary school                                                        | 0 - Up to HSC to TAFE certificate or diploma                      |
|                            |            | Completed years 7 to 9                                                          |                                                                   |
|                            |            | Completed School Certificate or Intermediate Certificate or Year 10 or 4th Form |                                                                   |
|                            |            | Completed High School Certificate or Leaving Certificate or Year 12 or 6th Form |                                                                   |
|                            |            | TAFE certificate or diploma                                                     |                                                                   |
|                            |            | University or some other tertiary institute degree or higher                    | 1 - University                                                    |
|                            |            | Don't know/Refused                                                              | 2 – don't know (treat as missing data in complete case analysis ) |
|                            |            | Other _____                                                                     | Categorise to relevant group                                      |

Appendix II

Outcome variables at 6 months of age

| Labels                          | Variables         | Responses/derivations                                                        |                                                                         |                  | Type of data / coding                                 |                                           |
|---------------------------------|-------------------|------------------------------------------------------------------------------|-------------------------------------------------------------------------|------------------|-------------------------------------------------------|-------------------------------------------|
| Current breastfeeding status    | S6_CBF2g          | Since this time yesterday, has your child been breastfed?                    |                                                                         | Yes              | 1 - Yes                                               |                                           |
|                                 |                   |                                                                              |                                                                         | No               | 0 - No                                                |                                           |
| Exclusive breastfeeding status  | S6_EBF2g          | Since this time yesterday, has your child been breastfed?                    |                                                                         |                  |                                                       |                                           |
|                                 |                   | Yes                                                                          | Since this time yesterday, did your child receive any of the following? |                  |                                                       |                                           |
|                                 |                   |                                                                              | No                                                                      |                  |                                                       | 1 - Yes                                   |
|                                 |                   |                                                                              | i. Vitamins, mineral supplements, medicine                              |                  |                                                       |                                           |
|                                 |                   |                                                                              | ii. Plain water                                                         |                  |                                                       |                                           |
|                                 |                   |                                                                              | iii. Sweetened or flavoured water                                       |                  |                                                       | 0 - No                                    |
|                                 |                   |                                                                              | iv. Fruit juice                                                         |                  |                                                       |                                           |
|                                 |                   |                                                                              | v. Tea or infusion                                                      |                  |                                                       |                                           |
|                                 |                   |                                                                              | vi. Infant formula                                                      |                  |                                                       |                                           |
|                                 |                   |                                                                              | vii. Solid or semi-solid food                                           |                  |                                                       |                                           |
|                                 |                   |                                                                              | viii. Thickener in bottle                                               |                  |                                                       |                                           |
|                                 |                   |                                                                              | ix. Other (specify)_____                                                |                  |                                                       |                                           |
| Refused (treat as missing data) |                   |                                                                              |                                                                         |                  |                                                       |                                           |
| No                              |                   |                                                                              |                                                                         |                  |                                                       |                                           |
| Introduction of solid food      | S6_AgeSolidFood2g | Has your child ever been given solid food?                                   |                                                                         |                  |                                                       |                                           |
|                                 |                   | Yes                                                                          | At what age was your child first given solid food?                      |                  |                                                       |                                           |
|                                 |                   |                                                                              | ___weeks                                                                | Convert to weeks | 6 months ( $\geq 26$ & $< 30$ weeks)                  | 1 - 6 months<br>0 - Before/after 6 months |
|                                 |                   |                                                                              | ___months                                                               |                  | Before or after 6 months ( $< 26$ or $\geq 30$ weeks) |                                           |
|                                 |                   | No                                                                           |                                                                         |                  |                                                       |                                           |
| Cup use                         | S6q24_cup2g       | Yes                                                                          |                                                                         |                  | 1 - Yes<br>0 - No                                     |                                           |
|                                 |                   | No                                                                           |                                                                         |                  |                                                       |                                           |
|                                 |                   | Don't know/refused (treat as missing data)                                   |                                                                         |                  |                                                       |                                           |
| Age of starting tummy time      | S6q31_TTwk        | days                                                                         | Converted to days                                                       |                  | Continuous data in days                               |                                           |
|                                 |                   | weeks                                                                        |                                                                         |                  |                                                       |                                           |
|                                 |                   | months                                                                       |                                                                         |                  |                                                       |                                           |
|                                 |                   | Don't know/refused (treat as missing data)                                   |                                                                         |                  |                                                       |                                           |
|                                 | S6q31_TTwk2g      | Categorised into 2 groups: $< 4$ weeks (28 days)<br>$\geq 4$ weeks (28 days) |                                                                         |                  | 1 - $< 4$ weeks<br>0 - $\geq 4$ weeks                 |                                           |

Appendix II Continuous

| Labels               | Variables           | Responses/derivations                                                                   | Type of data / coding                       |
|----------------------|---------------------|-----------------------------------------------------------------------------------------|---------------------------------------------|
| Tummy time frequency | S6q32_TTFrequency2g | How many days each week does your child spend time on their tummy when he/she is awake? |                                             |
|                      |                     | _____ days                                                                              | 1 - Every day (7 days)<br>0 – Not every day |
|                      |                     | Not at all                                                                              |                                             |
|                      |                     | Don't know/refused (treat as missing data)                                              |                                             |

Appendix III

*Outcome variables at 12 months of age*

| Labels                       | Variables           | Responses/derivations                                                                                                            | Type of data / coding    |
|------------------------------|---------------------|----------------------------------------------------------------------------------------------------------------------------------|--------------------------|
| Current breastfeeding status | Y1_12_CBF2g         | Yes                                                                                                                              | 1 – Yes<br>0 - No        |
|                              |                     | No                                                                                                                               |                          |
|                              |                     | Don't know/refused (treat as missing data)                                                                                       |                          |
| Breastfeeding duration       | Y1_13BFDurationWK   | Including times of weaning, what is the total time your child was breastfed?                                                     | Continuous data in weeks |
|                              |                     | _____ weeks                                                                                                                      |                          |
|                              |                     | _____ months                                                                                                                     |                          |
|                              |                     | Less than one week (code as 0.5 weeks)                                                                                           |                          |
|                              |                     | Don't know/refused (treat as missing data)                                                                                       |                          |
| Child BMI                    | Y1_CBMI             | Child weight _____ kg<br>Child height _____ cm<br>Child age at 12 months telephone survey<br>BMI will be calculated with         | Continuous data          |
| Child BMI z-score            | Y1_CBMIZscore       | Child weight _____ kg<br>Child height _____ cm<br>Child age at 12 months telephone survey<br>BMI z-score will be calculated with | Continuous data          |
| Cup use                      | Y1_31cup2g          | Is your child drinking from a cup?                                                                                               | 1 – Yes<br>0 - No        |
|                              |                     | Yes                                                                                                                              |                          |
|                              |                     | No                                                                                                                               |                          |
|                              |                     | Don't know/refused (treat as missing data)                                                                                       |                          |
| Bottle use at bedtime        | Y1_33bottle2g       | Yes                                                                                                                              | 1 – Yes<br>0 - No        |
|                              |                     | No                                                                                                                               |                          |
|                              |                     | Don't know/refused (treat as missing data)                                                                                       |                          |
| Meal together                | Y1_27mealtogether2g | How often do you sit down for family meals together?                                                                             | 0 - No<br><br>1- Yes     |
|                              |                     | Rarely                                                                                                                           |                          |
|                              |                     | Never                                                                                                                            |                          |
|                              |                     | Some of the time                                                                                                                 |                          |
|                              |                     | Most of the time                                                                                                                 |                          |
|                              |                     | Always                                                                                                                           |                          |
|                              |                     | Don't know/refused (treat as missing data)                                                                                       |                          |

Appendix III Continuous

| Labels                                     | Variables        | Responses/derivations                                                                                         | Type of data / coding |
|--------------------------------------------|------------------|---------------------------------------------------------------------------------------------------------------|-----------------------|
| Family/same meal                           | Y1_28samefood2g  | At meal times, how often do the adults in the house have the same food as the child?                          |                       |
|                                            |                  | Rarely                                                                                                        | 0 - No                |
|                                            |                  | Never                                                                                                         |                       |
|                                            |                  | Some of the time                                                                                              |                       |
|                                            |                  | Most of the time                                                                                              | 1 - Yes               |
|                                            |                  | Always                                                                                                        |                       |
| Don't know/refused (treat as missing data) |                  |                                                                                                               |                       |
| Food for reward                            | Y1_29foodaward2g | Do you ever give your child food to encourage good behaviour?                                                 | 1 - Yes               |
|                                            |                  | Yes                                                                                                           | 0 - No                |
|                                            |                  | No                                                                                                            |                       |
|                                            |                  | Don't know/refused (treat as missing data)                                                                    |                       |
| Child outdoor play time                    | Y1_35Cactivity2g | Over the last seven days, how much time does your child usually spend being active and moving around per day? |                       |
|                                            |                  | None                                                                                                          | ≤2 hours/day          |
|                                            |                  | 0 – 15 mins                                                                                                   |                       |
|                                            |                  | 15 – 60 mins                                                                                                  |                       |
|                                            |                  | 1 – 2 hours                                                                                                   |                       |
|                                            |                  | >2 hours                                                                                                      | >2 hours/day          |
| Don't know/refused (treat as missing data) |                  |                                                                                                               |                       |
| Child screen time                          | Y1_38ECST2g      | Has your child ever had any screen-time? This includes watching TV, using a smart phone or watching an iPad.  | 1 - Yes               |
|                                            |                  | Yes                                                                                                           | 0 - No                |
|                                            |                  | No                                                                                                            |                       |
|                                            |                  | Don't know/refused (treat as missing data)                                                                    |                       |

Appendix IV

Outcome variables at 24 months of age

| Labels                                | Variables      | Responses/derivations                                                                                                                                                                           | Type of data / coding                             |                   |
|---------------------------------------|----------------|-------------------------------------------------------------------------------------------------------------------------------------------------------------------------------------------------|---------------------------------------------------|-------------------|
| Child BMI                             | Y2_CBMI        | Child weight _____ kg<br>Child height _____ cm<br>Child age at 12 months telephone survey<br>BMI=weight (kg)/height (m) <sup>2</sup>                                                            | Continuous data                                   |                   |
| Child BMI z-score                     | Y2_CBMIZscore  | Child weight _____ kg<br>Child height _____ cm<br>Child age at 12 months telephone survey<br>BMI z-score will be calculated with WHO Anthro (v3.2.2).                                           | Continuous data                                   |                   |
| Child weight status at 2 years of age | Y2_CWeight4g   | Child weight status (underweight, normal weight, overweight, and obesity) were identified using age- and gender-specific international cut-off points (Cole T et al. 2000; Cole T et al. 2007). |                                                   |                   |
|                                       |                |                                                                                                                                                                                                 |                                                   |                   |
|                                       |                | Boy                                                                                                                                                                                             | Girl                                              |                   |
|                                       |                | ≤15.1                                                                                                                                                                                           | ≤14.8                                             | 0 -Underweight    |
|                                       |                | >15.1 to <18.4                                                                                                                                                                                  | >14.8 to <18.0                                    | 1 – Normal weight |
|                                       | ≥18.4 to <20.1 | ≥18.0 to <20.1                                                                                                                                                                                  | 2 - Overweight                                    |                   |
|                                       | ≥20.1          | ≥20.1                                                                                                                                                                                           | 3 - Obesity                                       |                   |
|                                       | Y2_CWeight2g   | Dichotomise child weight status by if they are overweight or obesity                                                                                                                            | 0 – Normal/under weight<br>1 - Overweight/obesity |                   |
| Bottle use                            | Y2_11bottle2g  | Does your child still use a bottle?                                                                                                                                                             |                                                   |                   |
|                                       |                | Yes                                                                                                                                                                                             | 1 – Yes                                           |                   |
|                                       |                | No                                                                                                                                                                                              | 0 - No                                            |                   |
|                                       |                | Don't know/refused (treat as missing data)                                                                                                                                                      |                                                   |                   |
| Child fruit consumption               | Y2_20CFruit    | Over the last seven days, how many serves of fruit did your child usually eat in a day?                                                                                                         |                                                   |                   |
|                                       |                | _____serves per day                                                                                                                                                                             | Continuous data in serves/day                     |                   |
|                                       |                | Doesn't eat fruit                                                                                                                                                                               |                                                   |                   |
|                                       |                | Don't know/refused (treat as missing data)                                                                                                                                                      |                                                   |                   |
|                                       | Y2_20CFruit2g  | Dichotomise child fruit consumption by mean/mode                                                                                                                                                | 0 - <mean serves/day<br>1 - ≥mean serves/day      |                   |
| Child vegetable consumption           | Y2_21CVeg      | Over the last seven days, how many serves of vegetables did your child usually eat in a day?                                                                                                    |                                                   |                   |
|                                       |                | _____serves per day                                                                                                                                                                             | Continuous data in serves/day                     |                   |
|                                       |                | Doesn't eat fruit                                                                                                                                                                               |                                                   |                   |
|                                       |                | Don't know/refused (treat as missing data)                                                                                                                                                      |                                                   |                   |
|                                       | Y2_20CVeg2g    | Dichotomise child vegetable consumption by mean/mode                                                                                                                                            | 0 - <mean serves/day<br>1 - ≥mean serves/day      |                   |



Appendix IV Continuous

| Labels                                                                    | Variables                 | Responses/derivations                                                                                                                                             | Type of data / coding                                                                         |                                       |
|---------------------------------------------------------------------------|---------------------------|-------------------------------------------------------------------------------------------------------------------------------------------------------------------|-----------------------------------------------------------------------------------------------|---------------------------------------|
| Food for reward                                                           | Y2_29foodaward<br>2g      | How often do you give your child food to encourage good behaviour?                                                                                                | 1 – Yes<br>0 - No                                                                             |                                       |
|                                                                           |                           | Yes                                                                                                                                                               |                                                                                               |                                       |
|                                                                           |                           | No                                                                                                                                                                |                                                                                               |                                       |
| Child outdoor play time                                                   | Y2_25COutdoorP<br>WK      | Think for a moment about a typical weekday for your child in the last month. How much time would you say your child spends playing outdoors on a typical weekday? | Continuous data in minutes/weekday                                                            |                                       |
|                                                                           |                           | _____ minutes                                                                                                                                                     |                                                                                               |                                       |
|                                                                           |                           | _____ hours                                                                                                                                                       |                                                                                               |                                       |
|                                                                           | Y2_26COutdoorP<br>WKN     | Now think about a typical weekend day for your child in the last month. How much time would you say your child spends playing outdoors on a typical weekend day?  | Continuous data in minutes/weekend day                                                        |                                       |
|                                                                           |                           | _____ minutes                                                                                                                                                     |                                                                                               |                                       |
|                                                                           |                           | _____ hours                                                                                                                                                       |                                                                                               |                                       |
|                                                                           | Y2_AveOutdoorP            | Calculated: (mins/weekday x 5 days + mins/weekend day x 2)/7days                                                                                                  | Continuous data in minutes/day                                                                |                                       |
|                                                                           | Y2_OutdoorP2g             | Dichotomise child average outdoor play time by mean/mode                                                                                                          | 0 - <mean serves/day<br>1 - ≥mean serves/day                                                  |                                       |
|                                                                           | Child weekday screen time | Y2_27CSTWK                                                                                                                                                        | During a usual week, how much time does your child spend doing each of the following at home? | Continuous data in minutes/5 weekdays |
|                                                                           |                           |                                                                                                                                                                   | watching television programs (include watching Netflix, Foxtel, or YouTube)                   |                                       |
| _____ minutes                                                             |                           |                                                                                                                                                                   |                                                                                               |                                       |
| watching smart phone, iPad, Tablet, etc.                                  |                           |                                                                                                                                                                   | _____ hours                                                                                   |                                       |
|                                                                           |                           |                                                                                                                                                                   | _____ minutes                                                                                 |                                       |
| using a computer or laptop                                                |                           |                                                                                                                                                                   | _____ hours                                                                                   |                                       |
|                                                                           |                           |                                                                                                                                                                   | _____ minutes                                                                                 |                                       |
| playing with an electronic game system (e.g. Playstation, Xbox, PSP etc.) | _____ hours               |                                                                                                                                                                   |                                                                                               |                                       |
|                                                                           | _____ minutes             |                                                                                                                                                                   |                                                                                               |                                       |
| Refused (treat as missing data)                                           |                           |                                                                                                                                                                   |                                                                                               |                                       |

Appendix IV Continuous

| Labels                          | Variables       | Responses/derivations                                                    |                                                                             | Type of data / coding                        |                                           |
|---------------------------------|-----------------|--------------------------------------------------------------------------|-----------------------------------------------------------------------------|----------------------------------------------|-------------------------------------------|
| Child screen time at weekends   | Y2_27CSTWK<br>N | weekends                                                                 | watching television programs (include watching Netflix, Foxtel, or YouTube) | ____ hours                                   | Continuous data in minutes/2 weekend days |
|                                 |                 |                                                                          |                                                                             | ____minutes                                  |                                           |
|                                 |                 |                                                                          | watching smart phone, iPad, Tablet, etc.                                    | ____ hours                                   |                                           |
|                                 |                 |                                                                          |                                                                             | ____minutes                                  |                                           |
|                                 |                 |                                                                          | using a computer or laptop                                                  | ____ hours                                   |                                           |
|                                 |                 |                                                                          |                                                                             | ____minutes                                  |                                           |
| Child average daily screen time | Y2_CST          | Calculation: (child weekday screen time + screen time at weekends)/7days |                                                                             | Continuous data in minutes/day               |                                           |
|                                 | Y2_CST2g        | Dichotomise child average screen time by mean/mode                       |                                                                             | 0 - <mean serves/day<br>1 - ≥mean serves/day |                                           |
