# Supplementary material
Source: PubMed Central journal article supplement (PMC7154951)
Supplement: jamapediatr-174-657-s003.pdf [file jamapediatr-174-657-s003.pdf]

## Data Sharing Statement

Wen. Effects of Telephone and Short Message Service Support on Infant Feeding Practices, "Tummy Time," and Screen Time at 6 and 12 Months of Child Age. *JAMA Pediatr.* Published April 13, 2020. 10.1001/jamapediatrics.2020.0215

### Data

**Data available:** Yes

**Data types:** Deidentified participant data, Data dictionary

**How to access data:** [liming.wen@health.nsw.gov.au](mailto:liming.wen@health.nsw.gov.au)

**When available:** beginning date: 12-01-2020, end date: 12-01-2024

### Supporting Documents

**Document types:** Statistical/analytic code, Informed consent form

**How to access documents:** [liming.wen@health.nsw.gov.au](mailto:liming.wen@health.nsw.gov.au)

**When available:** beginning date: 12-01-2020, end date: 12-01-2024

### Additional Information

**Who can access the data:** anyone requesting the data requires obtaining the ethics approval

**Types of analyses:** for a specified purpose

**Mechanisms of data availability:** with investigator support and with a signed data access agreement
